# Supplementary material for: Effect of an Immune-Boosting, Antioxidant and Anti-Inflammatory Food Supplement in Hospitalized COVID-19 Patients: A Prospective Randomized Pilot Study
Source: MDPI journal article supplement (doi:10.3390/nu15071736), 2023-04-01
Supplement: s1 [file s1]

## Supplementary Appendix

This appendix has been provided by the authors to give readers additional information about their work.

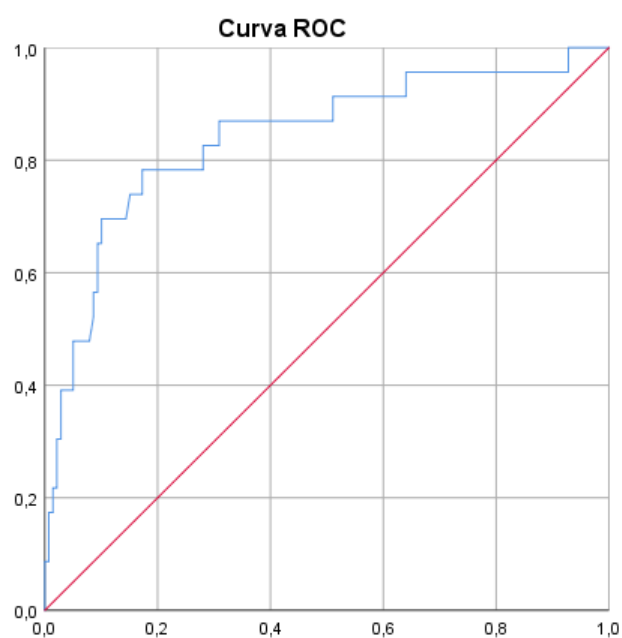

Figure S1.- ROC curve for evaluation of the potential effect of the food supplement Gasteel as a protector factor in the response. The value of the area under the curve (AUC) indicates the ability of the parameters studied as variable of exitus response.

Table S1. Summary of the main treatment administered during hospitalization of the study population, according the local guide. The P values were obtained with the  $X_2$  test and the Student's t test.

| Variable                            | Intervention group<br>N=70<br>n (%) | Control<br>group<br>N=69<br>N(%) | <i>p</i> |
|-------------------------------------|-------------------------------------|----------------------------------|----------|
| Chloroquine                         | 27(38.6)                            | 19(28)                           | 0.209    |
| <b>MACROLIDES</b>                   | 65(92.9)                            | 52(75,3)                         |          |
| Tocilizumab                         | 6(8.6)                              | 2(2.9)                           | 0.275    |
| Corticosteroids:                    | 41(58.6)                            | 36(52.2)                         | 0.497    |
| - Dexamethasone                     | 21(30)                              | 15(21.7)                         | 0.334    |
| - Methylprednisolone                | 29(42)                              | 15(21.7)                         | 0.017    |
| Baricitinib                         | 2(2.9)                              | 0(0.0)                           | 0.496    |
| Remdesivir                          | 4(5.8)                              | 1(1.4)                           | 0.366    |
| Anakinra                            | 1(1.4)                              | 0(0.0)                           | 1.00     |
| Inmunoglobulins                     | 1(1.4)                              | 0(0.0)                           | 1.00     |
| Lopinavir/ritonavir                 | 2(2.9)                              | 0(0.0)                           | 0.496    |
| Heparin at prophylactic doses       | 35(50)                              | 24(34.8)                         | 0.087    |
| Heparin at intermediate / full dose | 31(44.3)                            | 17(24.6)                         | 0.020    |
| <b>ANTIBIOTICS</b>                  | 30(42.9)                            | 25(36,2)                         |          |

Table S2. Evolution of the main analytical parameters for recovery evaluation during admission and discharge period.

| Variable                                                       | Intervention group n=70<br>mean±SD; | Control group<br>n=69<br>mean±SD | <i>p</i> |
|----------------------------------------------------------------|-------------------------------------|----------------------------------|----------|
| Creatinine at admission (mg/dL)                                | 0.99 ± 0.71                         | 0.91 ± 0.56                      | 0.434    |
| Creatinine at discharge (mg/dL)                                | 0.89±0.41                           | 1.21 ± 2.16                      | 0.237    |
| AST at admission (U/L)                                         | 33±30                               | 27±23                            | 0.259    |
| AST at discharge (U/L)                                         | 33±34                               | 27±15                            | 0.193    |
| ALT at admission (U/L)                                         | 28±28                               | 26±24                            | 0.622    |
| ALT at discharge (U/L)                                         | 43±40                               | 38±28                            | 0.388    |
| LDH at admission (U/L)                                         | 247±87                              | 251±114                          | 0.817    |
| LDH at discharge (U/L)                                         | 225±63                              | 227±94                           | 0.872    |
| Triglycerides at admission (mg/dL)                             | 140±79                              | 144±49                           | 0.719    |
| Triglycerides at discharge (mg/dL)                             | 173±122                             | 166±76                           | 0.757    |
| Ferritine at admission (ng/mL)                                 | 721±1067                            | 626±479                          | 0.520    |
| Ferritine at discharge (ng/mL)                                 | 662±614                             | 585±306                          | 0.414    |
| C- Reactive Protein at admission (mg/L)                        | 61±66                               | 55±54                            | 0.524    |
| C- Reactive Protein at discharge (mg/L)                        | 19±31                               | 23±37                            | 0.482    |
| Lymphocyte (absolute value) at admission (10 <sup>3</sup> /uL) | 128±80                              | 122±67                           | 0.639    |
| Lymphocyte (absolute value) at discharge (10 <sup>3</sup> /uL) | 197±395                             | 231±496                          | 0.663    |
| Platelets (absolute value) at admission (10 <sup>3</sup> /uL)  | 214±98                              | 221±98                           | 0.642    |
| Platelets absolute value) at discharge (10 <sup>3</sup> /uL)   | 250±121                             | 289±116                          | 0.056    |
| Fibrinogen level at admission (mg/dL)                          | 519±173                             | 530±152                          | 0.699    |
| Fibrinogen level at discharge (mg/dL)                          | 398±141                             | 447±169                          | 0.104    |

Table S3.- Pharmacological treatment algorithm in the patients recruited from March to April 2020.

|                                    |                                                                                                                                                                                                                                                                                                                                                                                                                                                                                                                                                                                                                                                                                                                                         |
|------------------------------------|-----------------------------------------------------------------------------------------------------------------------------------------------------------------------------------------------------------------------------------------------------------------------------------------------------------------------------------------------------------------------------------------------------------------------------------------------------------------------------------------------------------------------------------------------------------------------------------------------------------------------------------------------------------------------------------------------------------------------------------------|
| <b>No radiological involvement</b> | <b>Hydroxychloroquine</b>                                                                                                                                                                                                                                                                                                                                                                                                                                                                                                                                                                                                                                                                                                               |
| <b>Mild Pneumonia</b>              | <b>Azithromycin + Hydroxychloroquine</b> or<br>Hydroxychloroquine + Lopinavir-ritonavir                                                                                                                                                                                                                                                                                                                                                                                                                                                                                                                                                                                                                                                 |
| <b>Moderate Pneumonia</b>          | Azithromycin + Hydroxychloroquine or<br>Hydroxychloroquine + Lopinavir-ritonavir                                                                                                                                                                                                                                                                                                                                                                                                                                                                                                                                                                                                                                                        |
| <b>Severe Pneumonia</b>            | <p><b>Azithromycin + Hydroxychloroquine</b> or<br/>Hydroxychloroquine + Lopinavir-ritonavir</p> <p>consider adding <math>\beta</math>1- interferon</p> <p><b>If clinical, radiological or gasometric progression with analytical criteria of hyperinflammation, consider adding:</b></p> <p><b>Tocilizumab (anti-IL 6) +/-</b><br/> <b>Systemic corticosteroids:</b></p> <ul style="list-style-type: none"> <li>- Methylprednisolone 1-2 mg/kg/day during 3– 5 days or</li> <li>- Dexamethasone 20 mg/day during 5 days; in patients with ARDS (acute respiratory distress syndrome) 20 mg/day 5 días following by 10 mg/day five or more days</li> </ul> <p><b>Intravenous immune globulin therapy if bacterial superinfection</b></p> |

Table S4.- Pharmacological treatment algorithm in the patients recruited September to November 2020.

| <b>No radiological involvement</b>        | <b>Symptomatic treatment</b>                                                                                                                                                                                                                                                                                                                                                                                                                                                                                                                                                                                                               |
|-------------------------------------------|--------------------------------------------------------------------------------------------------------------------------------------------------------------------------------------------------------------------------------------------------------------------------------------------------------------------------------------------------------------------------------------------------------------------------------------------------------------------------------------------------------------------------------------------------------------------------------------------------------------------------------------------|
| <b>Mild Pneumonia</b>                     | <p><b>Remdesivir</b> if &lt; 7 days from the onset of symptoms plus: peripheral arterial oxygen saturation (SpO<sub>2</sub>) ≤ 94%, respiratory rate &gt;24 rpm or PaFiO<sub>2</sub>&lt;300.</p> <p><b>Dexamethasone 6 mg</b> if &gt; 7 days from the onset of symptoms plus SpO<sub>2</sub>&lt; 94%.</p>                                                                                                                                                                                                                                                                                                                                  |
| <b>Moderate Pneumonia</b>                 | <p><b>Remdesivir</b> if &lt; 7 days from the onset of symptoms plus: SpO<sub>2</sub> 94%, respiratory rate &gt;24 rpm or PaFiO<sub>2</sub>&lt;300.</p> <p><b>Dexamethasone 6 mg</b> if &gt; 7 days of onset of symptoms plus SpO<sub>2</sub>&lt; 94%.</p> <p><b>Methylprednisolone 125 mg</b> if absence of clinical, radiological or gasometric improvement in 72 hours of treatment with dexamethasone.</p>                                                                                                                                                                                                                              |
| <b>Severe Pneumonia</b>                   | <p>If SpO<sub>2</sub> &lt; 93%, needs of FiO<sub>2</sub> &gt; 0,35 to maintain SpO<sub>2</sub>&gt;94%; or PaFiO<sub>2</sub> &lt;300:</p> <p><b>Remdesivir</b> if &lt;7 days of clinical and does not require high-flow oxygen therapy / Noninvasive mechanical ventilation</p> <p><b>Dexamethasone 6 mg</b> if &gt;7 days from the onset of symptoms plus SpO<sub>2</sub>&lt; 94%.</p> <p><b>If clinical, radiological or gasometric progression, consider adding:</b></p> <p><b>Methylprednisolone</b> (125 or 250 mg).</p> <p><b>Tocilizumab (anti-IL6) o Anakinra (anti-IL1).</b></p> <p><b>Intravenous immune globulin therapy</b></p> |
| <b>Thromboprophylaxis in all patients</b> | At prophylactic or intermediate doses in those with a higher risk of thrombosis.                                                                                                                                                                                                                                                                                                                                                                                                                                                                                                                                                           |

#### Additional references

1. Anonymous, (2020) Ministerio de Sanidad. Gobierno de España. Documento técnico Manejo clínico del COVID-19: atención hospitalaria 2020. [https://www.mscbs.gob.es/profesionales/saludPublica/ccayes/alertasActual/nCov/documentos/Protocolo\\_manejo\\_clinico\\_ah\\_COVID-19.pdf](https://www.mscbs.gob.es/profesionales/saludPublica/ccayes/alertasActual/nCov/documentos/Protocolo_manejo_clinico_ah_COVID-19.pdf)
2. Anonymous, (2021). World Health Organization. COVID-19 clinical management: living guidance, 25 January 2021. World Health Organization, 2021 <https://apps.who.int/iris/handle/10665/338882>.

3. Geleris J, Sun Y, Platt J, et al. Observational Study of Hydroxychloroquine in Hospitalized Patients with Covid-19. *N Engl J Med*. 2020 Jun 18;382(25):2411-2418. doi: 10.1056/NEJMoa2012410.
4. Molina JM, Delaugerre C, Le Goff J, et al. No evidence of rapid antiviral clearance or clinical benefit with the combination of hydroxychloroquine and azithromycin in patients with severe COVID-19 infection. *Med Mal Infect*. 2020 Jun;50(4):384. doi: 10.1016/j.medmal.2020.03.006
5. Horby P, Lim WS, Emberson JR, et al. Dexamethasone in Hospitalized Patients with Covid-19. *N Engl J Med*. 2021 Feb 25;384(8):693-704. doi: 10.1056/NEJMoa2021436
6. Kalil AC, Patterson TF, Mehta AK, et al. ACTT-2 Study Group Members. Baricitinib plus Remdesivir for Hospitalized Adults with Covid-19. *N. Engl. J. Med*. 2021 Mar 4;384(9):795-807. doi: 10.1056/NEJMoa2031994
